# Supplementary material for: Calcification and latitudinal distribution of extant coccolithophores across the Drake Passage during late austral summer 2016
Source: Copernicus journal article supplement (doi:10.5194/bg-16-3679-2019), 2019-09-30
Supplement: Supplementary file 1 [file bg-16-3679-2019-supplement.zip]

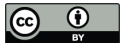

## *Supplement of*

# **Calcification and latitudinal distribution of extant coccolithophores across the Drake Passage during late austral summer 2016**

**Mariem Saavedra-Pellitero et al.**

*Correspondence to:* Mariem Saavedra-Pellitero ([msaavedr@uni-bremen.de](mailto:msaavedr@uni-bremen.de))

- [bg-16-3679-2019-supplement-title-page.pdf](#)
- [Matlab\\_code\\_Saavedra-Pellitero.m](#)
- [Supplementary\\_material\\_Saavedra\\_et\\_al.pdf](#)

The copyright of individual parts of the supplement might differ from the CC BY 4.0 License.
